# Supplementary material for: White light emission with tuneable colour temperature and high colour rendering index from CdS/Si multi-interface nanoheterojunctions
Source: Royal Society of Chemistry journal article supplement (doi:10.1039/c7nr01053b), 2017-01-01
Supplement: c7nr01053b1.pdf [file c7nr01053b1.pdf]

# White light emission with tuneable colour temperature and high colour rendering index from CdS/Si multi-interface nanoheterojunctions

Yong Li,\* Yue Li Song, Peng Fei Ji and Feng Qun Zhou\*  
Email: [liyong@pdsu.edu.cn](mailto:liyong@pdsu.edu.cn) (Y Li), [zfq@pdsu.edu.cn](mailto:zfq@pdsu.edu.cn) (FQ Zhou)

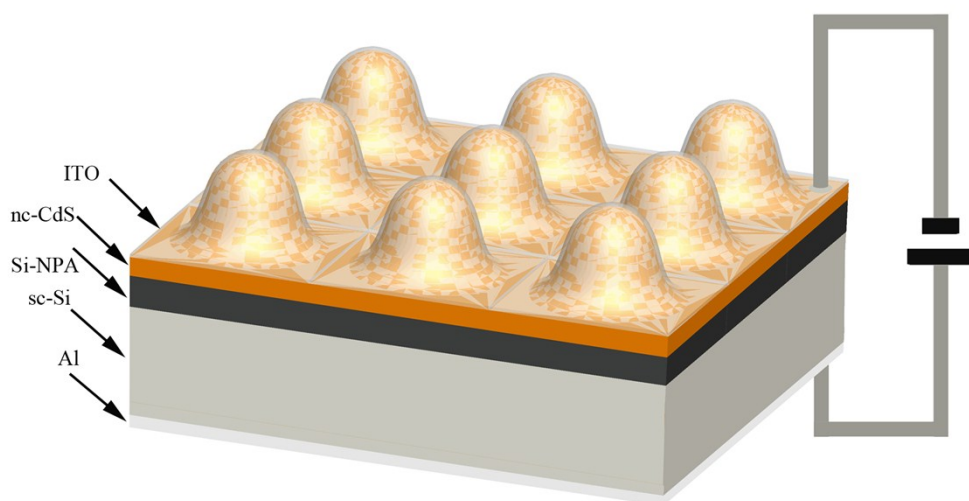

Figure S1 The diagram of final device.
